# Supplementary material
Source: publisher figshare collection journal article supplement (https://gsajournals.figshare.com/articles/dataset/_/14312381)
Supplement: Supplementary file 1 [file 1]

## Sheet: TableS1_additiveEffects
Table S1. Additive effect of each QTL on each Procrustes coordinate estimated from multivariate multiple-QTL mapping.
qtl	coord_1	coord_2	coord_3	coord_4	coord_5	coord_6	coord_7	coord_8	coord_9	coord_10	coord_11	coord_12	coord_13	coord_14	coord_15	coord_16	coord_17	coord_18	coord_19	coord_20	coord_21	coord_22	coord_23	coord_24	coord_25	coord_26	coord_27	coord_28	coord_29	coord_30	coord_31	coord_32
1@4.0	-4.47e-05	0.000506293	0.000553733	0.000514751	0.00031464	0.0013212	0.00182612	0.000638006	0.00114871	3.62e-05	-0.000450036	-0.000206284	0.000477417	-0.00040242	9.92e-05	-0.00060808	-5.05e-05	-0.000560387	0.000905609	-0.000823103	-0.00299256	-0.000471917	2.83e-06	0.000379222	-0.000931606	-0.000240422	-3.45e-06	0.000119636	-0.000537396	-0.000602016	-0.000318004	0.000399297
1@36.4	0.0004636	0.000596789	-0.000846841	0.000573759	9.81e-05	-0.000258208	-0.000179016	-0.00032324	0.000581174	-0.00043856	0.00126119	0.000272262	-0.000717874	0.000451579	0.000920532	-3.24e-05	0.00100041	-0.00019007	-0.000777141	-0.00120199	-0.00210773	-0.000415296	0.000291784	0.000744453	0.000318651	0.000299722	0.000420247	0.000251927	-0.00100229	-0.000217681	0.00027521	-0.00011307
2@22.7	0.000459477	8.4e-05	0.00154626	0.000167753	0.000472062	-0.00015232	-0.000382598	-0.000972792	4.04e-06	-0.000403398	1.46e-05	-0.000592951	0.000966356	7.92e-05	0.000271782	-0.000605248	-2.68e-05	-0.000289208	-0.0012384	-0.000410658	-0.00129883	0.00108044	0.000216711	0.000491295	-0.000998883	0.000646172	-0.000389489	0.000452255	-0.00018973	-0.000713404	0.000573454	0.0011389
2@44.4	-0.000278522	0.000419421	-0.00193988	0.000228063	-0.000394106	-0.000113688	0.0042003	0.000286278	0.000685724	0.00117676	0.000639924	-0.000548314	-0.00205856	-0.000996683	0.000172708	-0.000618077	-0.00187383	0.000433186	0.000189871	4.29e-05	-7.32e-05	-0.000519075	-0.00109438	-0.000360161	-0.000585426	-0.000412991	0.00154746	0.000821724	0.00021783	0.000692654	0.000644053	-0.000531964
2@70.1	0.000661871	0.00137476	0.00141208	-0.00106711	-0.000310965	-0.000334654	-0.00209836	0.00178865	-0.00244386	0.0013127	0.00122087	0.00126142	0.00176168	-0.000248953	0.00179258	0.000157859	-0.000420151	-0.00148125	0.000393717	-0.000227438	0.00186357	-0.000278655	-0.00115703	-0.000595532	-0.00062252	-0.00119777	-0.00058593	-0.00041346	-0.000775607	-0.000213826	-0.00069195	0.000163261
2@80.1	-0.00113528	-0.000840294	-0.00135693	0.000625366	-0.000418133	0.000395038	0.00374089	-0.0012236	0.00157574	-0.000478208	-0.00145998	-0.000613682	-0.00160502	0.000931291	-0.00179483	-0.000603277	-7.16e-05	0.000550041	-0.000707366	0.000348914	-0.000150067	0.000219687	-0.000392136	-0.00019687	0.00156349	0.000886208	0.00131971	0.000637517	0.000661016	0.000509437	0.000230498	-0.00114757
3@30.0	-4.18e-05	-0.000377254	-0.000668507	0.00085458	0.000116062	0.000128146	0.000122238	-9.24e-05	0.00126783	-0.000693357	0.000307187	-0.000636111	-0.00117133	0.000169221	9.89e-05	-0.000407635	4e-06	0.00129559	-8.41e-05	9.16e-05	0.000214658	-0.000930741	-0.0024116	-0.000159338	0.00156504	0.000239919	-0.000838505	3.67e-05	0.000229047	-0.000536265	0.0012909	0.00101746
3@53.5	-0.000696408	-0.000312672	-0.000391449	-0.000489298	-0.00064811	-0.000100003	0.000374208	0.00162198	-0.00101958	0.00121129	-0.000120346	0.000519762	0.00067753	7.23e-05	0.000917691	4.91e-06	0.000295006	-0.000868558	8.61e-05	-0.000925142	-0.000617967	-0.000839826	0.00186858	0.000303252	-0.000225349	-4.89e-05	0.00077569	7.56e-05	5.44e-05	0.00034724	-0.00132999	-0.000571938
4@2.9	0.00058928	2.03e-05	0.000373754	-0.000221936	0.000177455	3.12e-05	-0.00198212	0.000135802	-0.000646338	-0.00040075	0.000746346	-4.99e-05	0.000558147	0.000223221	0.000839439	0.000404786	-0.000146514	0.000393326	-4.48e-05	-0.000625892	-0.00060311	-8.09e-05	0.00161898	0.000128953	-0.000303863	0.000410025	-0.000689477	-0.000125627	-0.00069185	-0.000108371	0.00020464	-0.000134309
4@44.9	0.00033131	-0.000182209	0.00015153	0.000799035	0.00116345	0.00085991	-0.00129504	-0.000705979	-0.000110114	0.000161937	-0.000153871	0.000545543	-5.56e-05	0.00137022	0.00126235	0.00079159	0.000298367	-0.000292653	0.0013464	-0.0018906	-0.000999394	-0.00150542	0.00075457	0.000888781	3.11e-05	6.14e-05	-0.00105161	-0.00055331	-0.00144149	-0.00132533	-0.000231949	0.000977065
4@60.5	-0.000176274	0.00124919	0.0003523	-0.000392189	0.0005993	-0.000443355	0.00117071	-0.000581526	-0.000111847	-0.000750147	0.000380936	-0.000613505	0.000572551	-0.00103483	-0.000778847	-0.000441545	0.000220807	-5.64e-07	-0.000791692	0.00180936	-0.000398642	0.00153134	-0.00398977	-0.000669229	-0.000575018	-0.000460737	0.0017656	0.000346115	0.000375888	0.00118257	0.00138399	-0.000730948
5@57.5	-0.000408041	-0.000249794	0.00071966	-0.000244613	0.000344401	-0.000227582	-0.000206872	0.00027985	0.000630528	-3.28e-06	0.00030235	0.000278787	0.000423884	0.000279494	0.000640594	3.56e-05	-0.000408214	-0.000989208	-0.000305996	-0.000565591	-0.00136408	-0.000849406	-0.000191929	0.000374132	0.000934072	0.000748444	-0.00112903	0.000209714	-0.000275321	0.000531631	0.000293991	0.000391809
6@37.9	0.000861981	0.000801115	0.000165918	-5.59e-05	0.000207943	2.45e-05	-0.00212286	-0.000398611	-0.000443292	-0.000337484	0.000372618	0.000461034	0.000862396	-0.000438834	0.000226032	-0.000371733	0.000768583	0.000323004	-0.000358222	0.00126026	-0.000614619	2.54e-05	0.000826495	-0.000144446	0.000637241	-0.000211263	-0.00154777	-0.000535668	-7.12e-05	-0.000509347	0.000228727	0.000107939
7@33.3	-0.000279569	-0.00115257	-0.000225206	4.99e-05	0.000129003	6.78e-05	-0.000381502	-0.000268103	-0.00125812	0.000428209	-0.00159387	-0.00119527	-0.00109784	-0.000549321	-0.00163893	-0.0011186	-0.000304018	0.00180135	0.00170422	0.00237427	0.00149688	0.00147895	0.00134997	-0.000598871	0.00126413	-0.000137057	-0.000239151	-0.000417518	-6.04e-05	-0.00158656	0.00113442	0.000823466
7@50.5	0.00133211	0.000609252	2.59e-05	-7.38e-05	-0.000671055	0.00045855	-0.0013939	0.00113252	-0.00068319	0.0004012	0.00114237	0.00137761	0.000679573	0.000941098	0.00169604	0.00126599	0.000450919	-0.00118849	0.000513509	-0.00265667	0.000814097	-0.0012933	0.000986764	0.000360959	-0.000701184	-0.000512895	-0.000997485	-0.000959022	-0.000184191	-0.000221782	-0.00301027	0.000358741
9@29.8	7.16e-05	-0.000587112	0.00132627	-0.000222959	0.00116272	0.000162428	-0.00482143	-0.000380766	-0.00132864	-0.000664047	0.000493311	0.000539558	0.00185411	0.000356573	0.00129418	-6.5e-05	0.00102067	7.82e-05	9.14e-05	0.000201122	0.000129388	0.000570773	-0.000997637	0.000776294	-0.00058971	-0.000577418	0.000543882	-0.00027754	-3.02e-05	-0.0006065	-0.000219855	0.000696335
10@7.0	-0.000270683	-0.000951754	-0.000792926	-0.000304941	0.000102103	-5.06e-05	-0.00197091	0.000364754	-2.56e-05	-0.000187089	0.00135109	0.000830995	-0.00119602	-0.000277629	0.000992948	0.00011169	0.00084193	0.000224876	0.000766833	-0.00039751	0.000371074	-0.000409831	-0.00205205	0.00038947	0.000395139	0.000372157	0.00132973	9.38e-05	0.000367543	-0.000147767	-0.000210158	0.00033945
10@51.1	0.000372777	-0.000765361	-0.000526602	-0.000287056	-0.000338954	-0.000202909	-0.000227021	0.000282429	8.77e-05	6.2e-05	-0.0010573	0.000590216	-0.000792505	-0.000651914	-0.00112009	-0.000499851	0.00140745	0.000715159	0.00238208	-0.000629465	-0.000579379	0.000861072	4.78e-05	0.0011958	-0.000551558	0.000300174	0.0013051	-0.000397226	-0.000250964	-0.000852468	-0.000158557	0.000279395
11@31.0	-0.000641245	-0.00111675	-0.000804645	0.000314214	0.000635222	-0.000310793	0.000416972	-1.98e-06	0.000794866	0.000625112	-0.00088974	-0.000585378	-0.000585094	-0.000493115	-0.00020154	-0.00116355	0.000445521	0.000342017	-0.000901783	0.000288074	-5.25e-05	0.000374756	-0.000488125	0.000877372	0.000541709	0.00037353	0.0012203	0.000400525	-0.000383655	-0.000350601	0.000893765	0.000426582
11@59.6	0.000108309	9.98e-05	0.000698631	-0.000674496	-0.000977879	-0.000240522	-0.00229905	0.000231419	3.88e-05	-0.00020275	0.00211482	0.000230034	0.000702477	6.82e-06	0.0013569	0.000411691	-0.00043643	-7.91e-05	-0.00106091	-0.000761385	-0.00110799	-0.000692304	0.00193934	0.00065407	-0.000681147	0.000418623	-0.000195944	5.11e-05	0.000357832	0.000379316	-0.000557804	0.000167754
12@43.3	-0.000266641	0.00137465	0.000474272	4.54e-05	1.52e-05	0.000560995	0.00246067	-0.00028973	0.00051869	-0.000210821	0.000199509	6.22e-05	0.00129357	0.00096153	0.00105512	-3.72e-06	0.000591835	-0.000914044	-0.000833095	-0.00209964	-0.00346399	-0.00119375	-0.00139643	0.000322075	-0.000767084	0.000364341	-0.000829252	-0.000235483	0.000528311	0.0010112	0.000419279	0.000244823
13@38.2	-0.000153433	-0.000383708	-0.000151263	-0.000237359	-6.27e-05	-0.000101423	0.00094182	-0.00128907	-6.5e-05	-0.00161321	-0.000755573	-0.00126555	0.000383972	0.000355044	-0.00025179	-2.89e-05	-0.00129344	7.59e-05	-0.000401128	0.000972156	-0.00213047	0.0015713	0.00103969	0.000465266	0.000584465	0.000664486	0.00105969	0.000607585	0.000531259	0.000685266	0.000723886	-0.000477788
14@11.9	0.000706598	0.000672896	0.000917979	-0.000122648	7.72e-05	0.000231775	0.000894285	6.89e-05	9.49e-05	-0.000178328	-0.000102668	-0.000170376	0.000782075	-0.000658901	6.69e-05	4.72e-06	-0.000817847	-0.00051398	0.000741143	0.000405019	-0.000852105	0.000305305	-0.000492356	-0.000534798	-0.000414014	4.54e-05	-0.00048489	-0.000321366	0.000874877	-7.27e-05	-0.00199214	0.000839151
14@54.7	-0.000258268	-0.000834768	-0.000451615	0.000152245	0.0005432	-0.000409234	-0.000770647	0.000367727	-0.000217015	0.00041823	-0.00127118	-0.000172269	-0.000485265	7.9e-05	-0.00130894	-0.000247576	0.000601963	0.000656915	0.00203315	0.000912769	0.00161451	0.000125446	-0.00164652	-0.000520213	0.000606281	0.000102854	-0.000103086	-0.000179614	-0.000141784	-0.000672333	0.00125521	0.000220865
15@1.3	0.00014405	-0.000492929	0.000260892	-0.000259963	-0.000293583	-0.000267698	-0.000361836	-0.000155167	-0.000885422	0.00056903	-0.000129756	0.000595654	-0.000342325	0.00132694	0.000153527	0.00113609	0.000367967	-7.06e-05	0.00133367	-0.00123775	0.00143257	-0.00140621	0.000293596	4.73e-06	-0.000926086	-0.000144383	-0.00016161	-9.61e-06	-0.000183033	-3.96e-05	-0.000702623	0.000451474
15@52.4	0.000642995	0.000536429	-0.000457663	0.000168953	-0.000670785	2.95e-05	0.00294625	-0.000290763	0.00159247	-0.00025881	-0.000783688	-0.000304679	-0.000670796	3.45e-05	-0.000416516	-0.000549284	0.000302659	0.000292983	-0.000762919	-0.000955551	-0.00161398	-0.000606308	7.47e-05	0.000677685	0.000309937	0.000817507	-0.000402221	0.000362871	-0.000397588	-0.000178075	0.000307186	0.000223014
16@23.9	0.000463122	-0.000508794	-0.00023801	-0.000208281	-0.000581295	-0.000610471	0.00138004	-0.000954592	0.00053225	-0.000300146	4.71e-05	-8.59e-05	-0.000725513	-0.000724169	-0.000480323	-0.000636143	-0.00116927	-9.43e-05	0.000573056	0.00132786	-0.00123823	0.00044426	-0.000848491	-6.85e-05	0.00055973	0.00118598	0.000958879	0.00102294	0.000534263	2.21e-05	0.00023273	0.000188163
17@2.6	0.000727835	0.00170426	9.38e-05	-0.000181176	-0.000770366	0.000541644	0.00156347	-0.000140722	0.000212574	7.68e-05	0.00104275	0.000892292	-3.08e-05	0.000725219	0.000974903	0.000423568	-0.000601732	-0.00155957	-0.00162236	-0.0003095	0.00216717	-0.00102558	-0.00239267	-0.000655811	-0.000221719	-1.5e-05	-0.000530117	-0.000361122	0.000746792	0.000539171	-0.00135955	-0.000654415
17@16.5	5.76e-05	-0.00117314	-0.000359417	0.0003862	-0.000358824	-0.000393309	-0.000872726	-0.000465347	-0.00067839	-0.000464305	-0.00136992	-0.0014744	-0.000343851	-0.00148806	-0.00180186	-0.000907632	-6.72e-05	0.00260903	0.00124062	0.0024321	-0.000823478	0.00160903	0.0023745	0.000247562	0.00201353	-3.4e-05	-0.000778369	-0.000596598	-2.54e-05	-0.00113598	0.00179318	0.000848891
